# Supplementary material for: Effects of varying nano-ZnO concentrations on the physiology, biochemistry, root exudate, and root microbial community of Agrostis stolonifera
Source: Royal Society of Chemistry journal article supplement (doi:10.1039/d4en00584h), 2024-01-01
Supplement: d4en00584h1.pdf [file d4en00584h1.pdf]

## Supporting Information

### Effects of Varying Nano-ZnO Concentrations on the Physiology, Biochemistry, Root Exudate, and Root Microbial Community of *Agrostis Stolonifera*

Yian Wang <sup>1, \*</sup>, Ronghui Wang <sup>1</sup>, Jiale He <sup>1</sup>, Tao Li <sup>1</sup>, Xinyue Fu <sup>1</sup>, Jiaxin Li <sup>1</sup>, and  
Genhe He <sup>1, \*</sup>

1. School of Life Science, Jinggangshan University, Ji'an 343009, Jiangxi, China.

E-mail: Yian Wang ([nickowya@163.com](mailto:nickowya@163.com)); Ronghui Wang ([18300472912@163.com](mailto:18300472912@163.com));

Jiale He ([m18679465460@163.com](mailto:m18679465460@163.com)); Tao Li ([2010591132@qq.com](mailto:2010591132@qq.com)); Xinyue Fu

([18607060048@163.com](mailto:18607060048@163.com)); Jiaxin Li ([2672262237@qq.com](mailto:2672262237@qq.com)); Genhe He

([hegenhe@jgsu.edu.cn](mailto:hegenhe@jgsu.edu.cn))

\*Co-corresponding authors: Yian Wang ([nickowya@163.com](mailto:nickowya@163.com)) and Genhe He

([hegenhe@jgsu.edu.cn](mailto:hegenhe@jgsu.edu.cn))

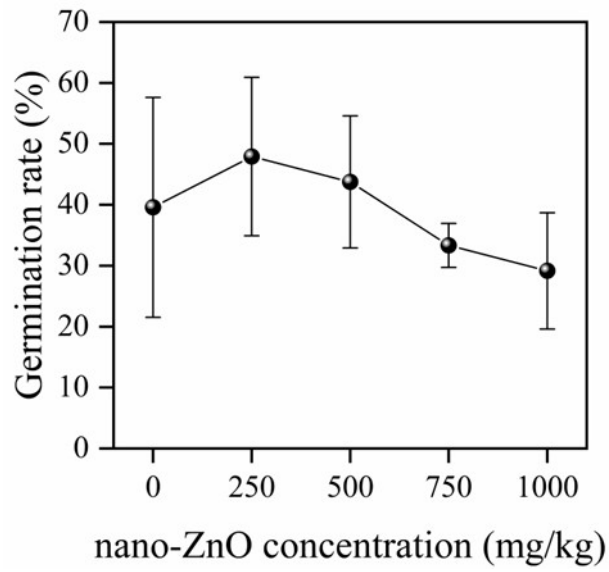

**Fig. S1.** Germination rate of *Agrostis Stolonifera* at varying nano-ZnO concentrations.

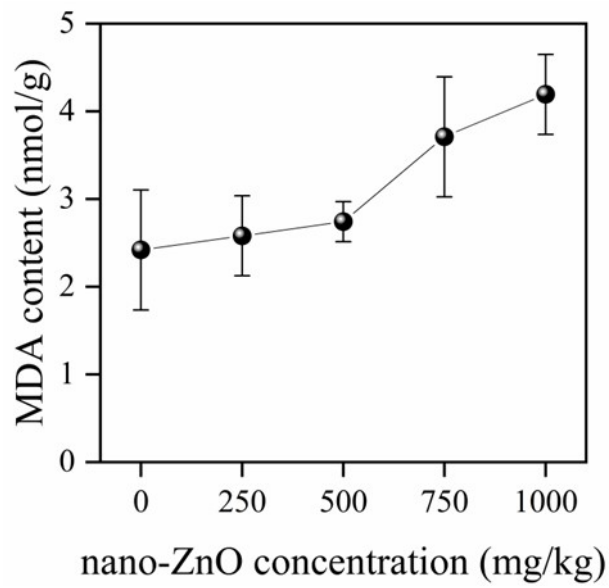

**Fig. S2.** MDA content in leaf tissues of *Agrostis Stolonifera* at varying nano-ZnO concentrations.

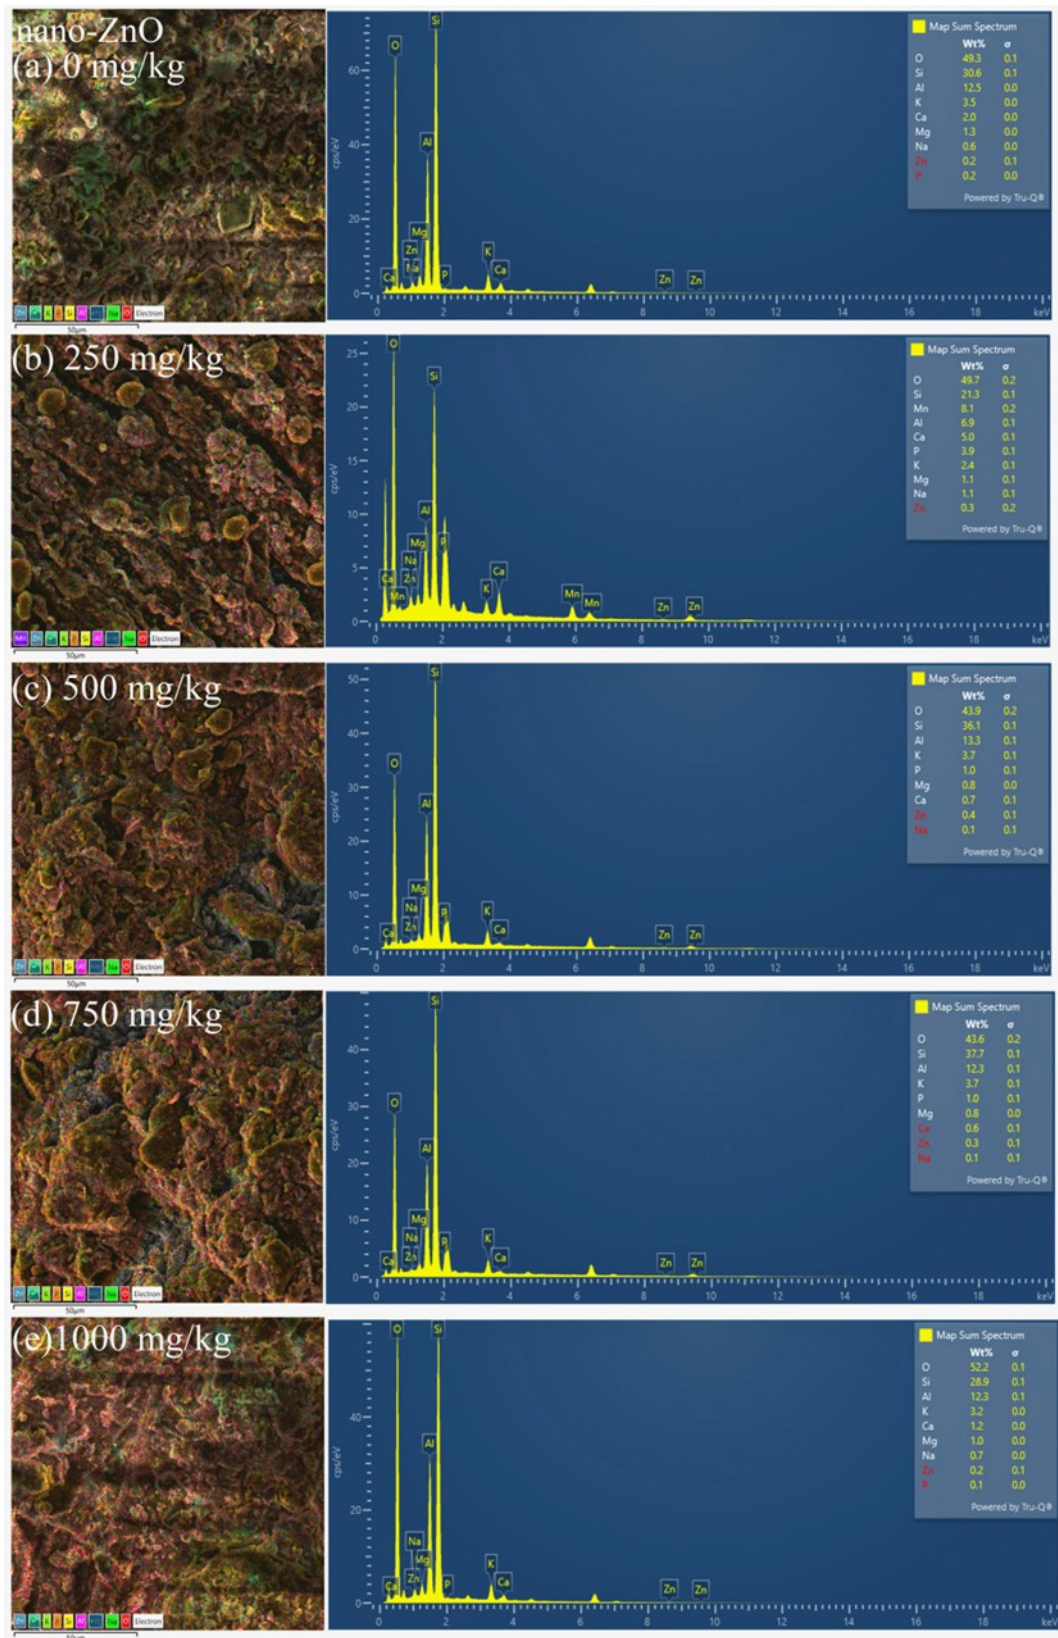

**Fig. S3.** SEM-Mapping with element composition analysis of root tissues in *Agrostis Stolonifera* at varying nano-ZnO concentrations.

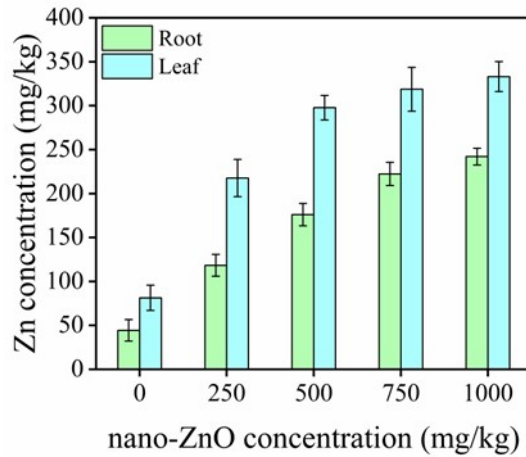

**Fig. S4.** Zn concentration of root and leaf tissues of *Agrostis Stolonifera* at varying nano-ZnO concentrations.

**Table S1.** Alpha diversity indices of root microbial community of *Agrostis Stolonifera* at varying nano-ZnO concentrations.

|          | nano-ZnO concentrations |           |           |           |            |
|----------|-------------------------|-----------|-----------|-----------|------------|
|          | 0 mg/kg                 | 250 mg/kg | 500 mg/kg | 750 mg/kg | 1000 mg/kg |
| Chao1    | 2280.512                | 1855.064  | 1796.542  | 1689.5    | 1875.636   |
| ACE      | 2285.66                 | 1858.384  | 1800.558  | 1688.652  | 1874.406   |
| Shannon  | 7.063892                | 6.744568  | 6.655186  | 6.591763  | 6.823909   |
| Simpson  | 0.001557                | 0.002321  | 0.003024  | 0.003555  | 0.001902   |
| Coverage | 0.999122                | 0.999297  | 0.999345  | 0.999425  | 0.998962   |
